# Supplementary material for: Loss of Novel Diversity in Human Gut Microbiota Associated with Ongoing Urbanization in China
Source: PubMed Central journal article supplement (PMC9426419; doi:10.1128/msystems.00200-22), 2022-06-21

Age

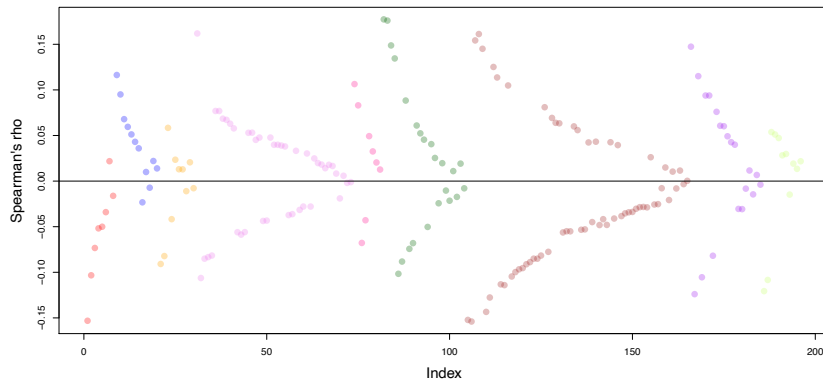

- Actinomycetales
- Bacteroidales
- Christensenellales
- Coriobacteriales
- Enterobacteriales
- Erysipelotrichales
- Lachnospirales
- Lactobacillales
- Oscillospirales
- other
- Saccharimonadales
- novel
- known

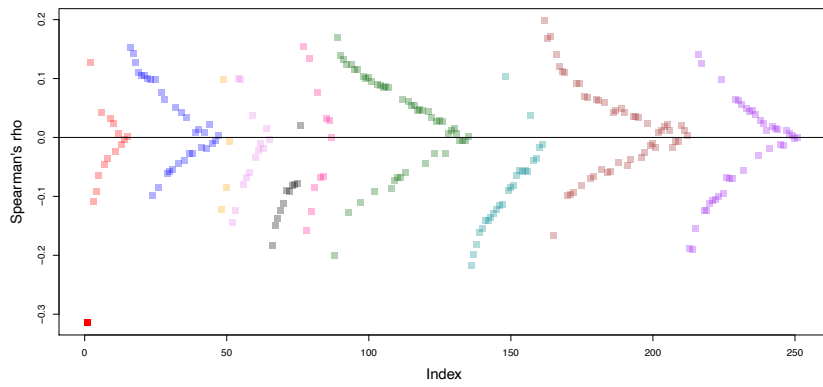

# Physical activity

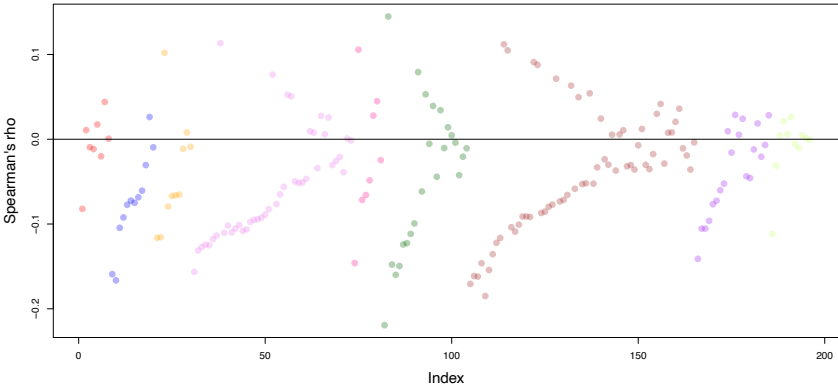

- Actinomycetales
- Bacteroidales
- Christensenellales
- Coriobacteriales
- Enterobacteriales
- Erysipelotrichales
- Lachnospirales
- Lactobacillales
- Oscillospirales
- other
- Saccharimonadales
- novel
- known

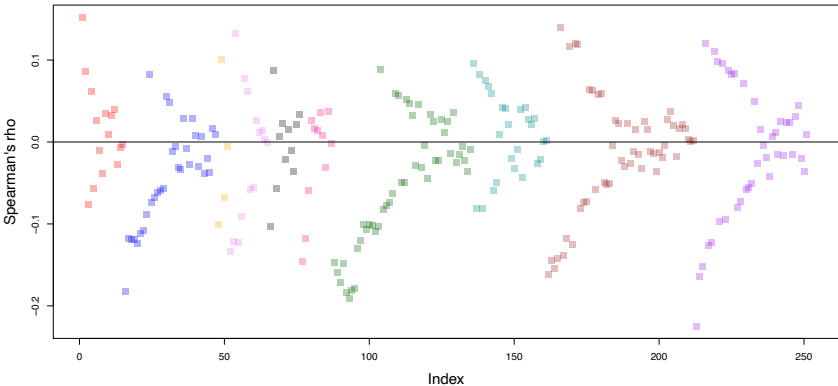

# Energy intake

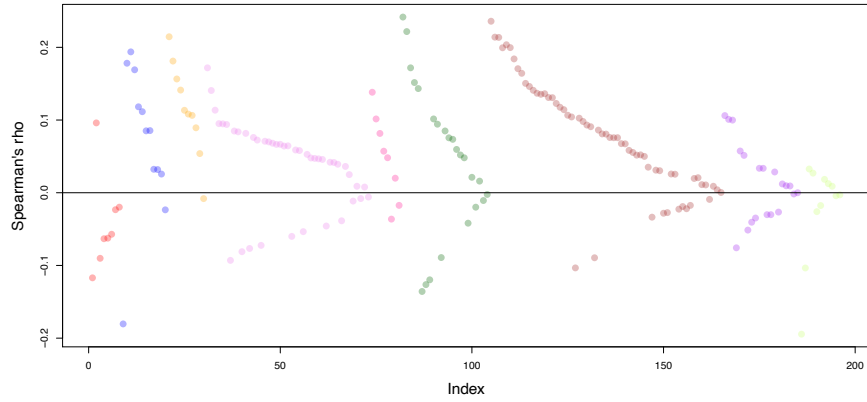

- Actinomycetales
- Bacteroidales
- Christensenellales
- Coriobacteriales
- Enterobacterales
- Erysipelotrichales
- Lachnospirales
- Lactobacillales
- Oscillospirales
- other
- Saccharimonadales
- novel
- known

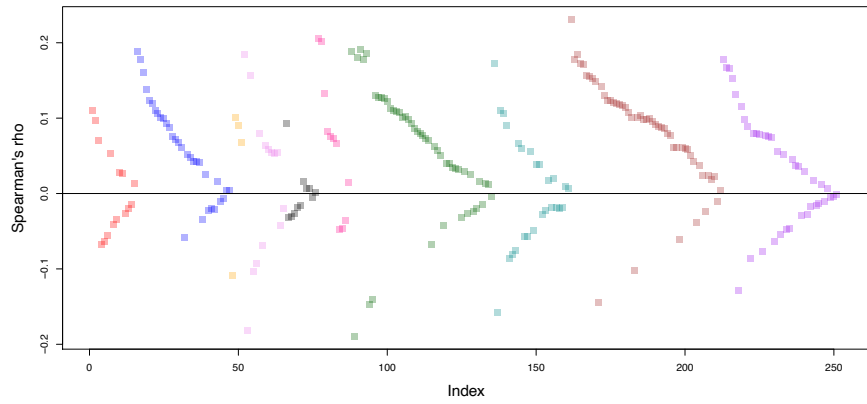

# Fiber intake

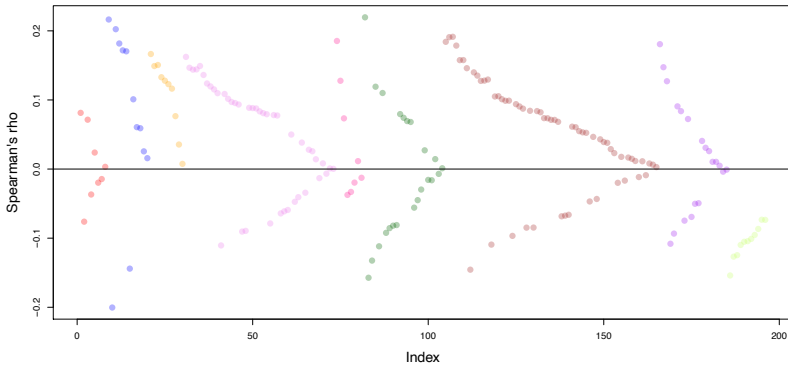

- Actinomycetales
- Bacteroidales
- Christensenellales
- Coriobacteriales
- Enterobacterales
- Erysipelotrichales
- Lachnospirales
- Lactobacillales
- Oscillospirales
- other
- Saccharimonadales
- novel
- known

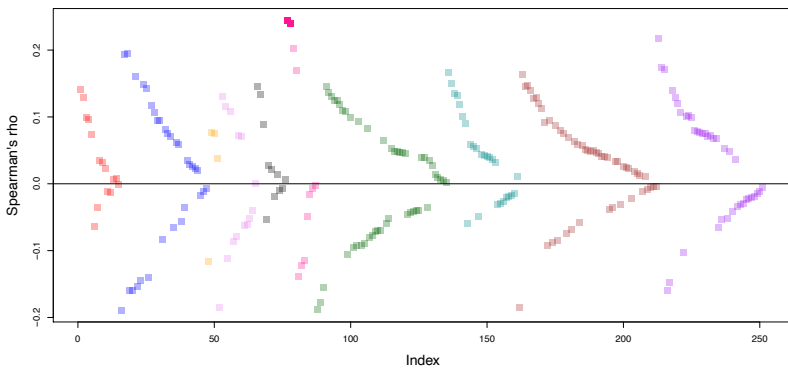

# BMI

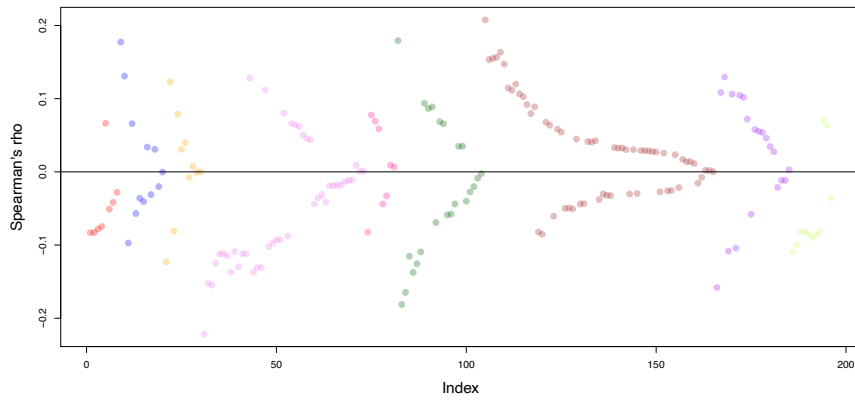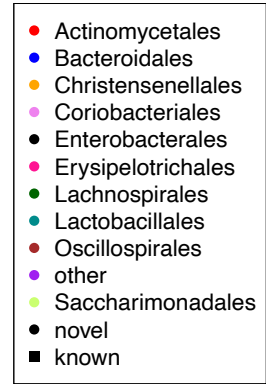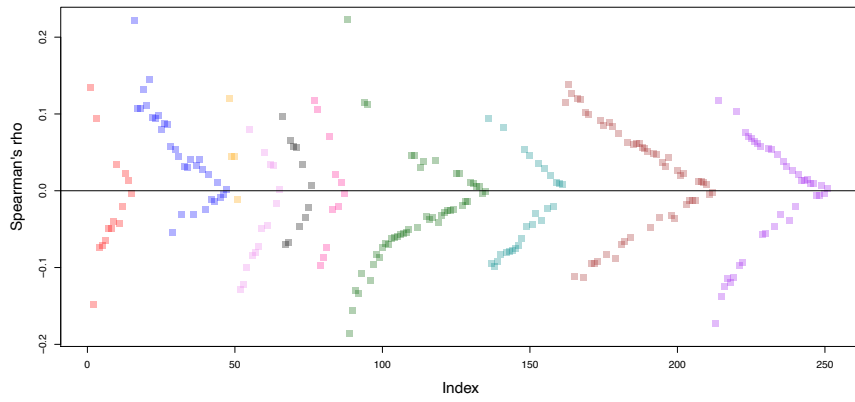

Sex

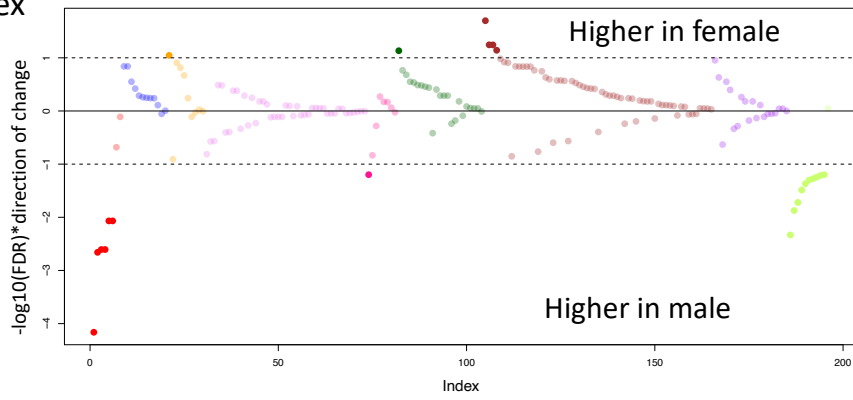

- Actinomycetales
- Bacteroidales
- Christensenellales
- Coriobacteriales
- Enterobacterales
- Erysipelotrichales
- Lachnospirales
- Lactobacillales
- Oscillospirales
- other
- Saccharimonadales
- novel
- known

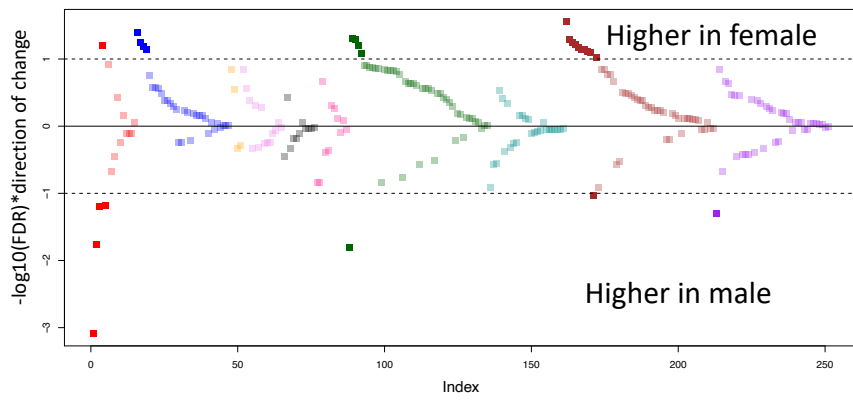

# Education

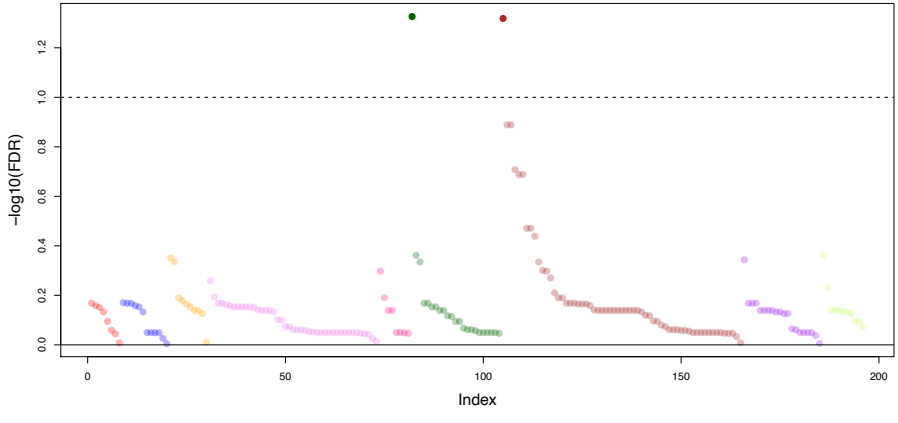

- Actinomycetales
- Bacteroidales
- Christensenellales
- Coriobacteriales
- Enterobacteriales
- Erysipelotrichales
- Lachnospirales
- Lactobacillales
- Oscillospirales
- other
- Saccharimonadales
- novel
- known

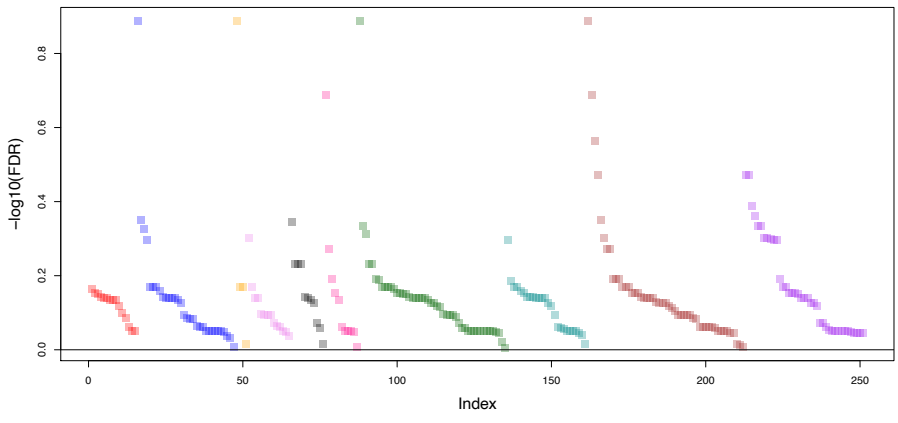

# Drinking water source

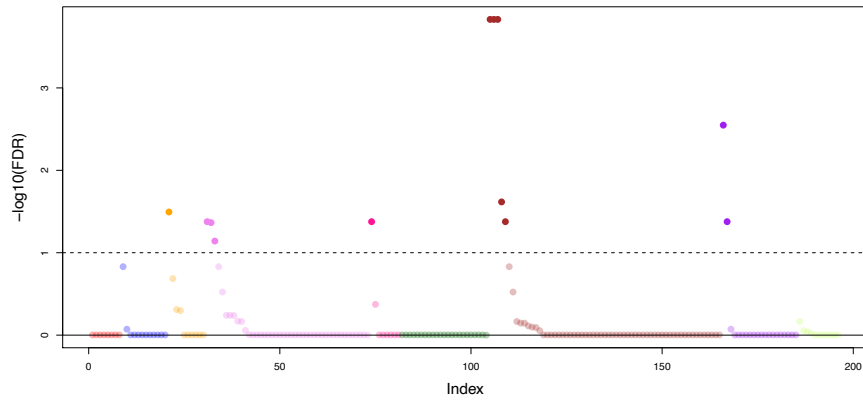

- Actinomycetales
- Bacteroidales
- Christensenellales
- Coriobacteriales
- Enterobacteriales
- Erysipelotrichales
- Lachnospirales
- Lactobacillales
- Oscillospirales
- other
- Saccharimonadales
- novel
- known

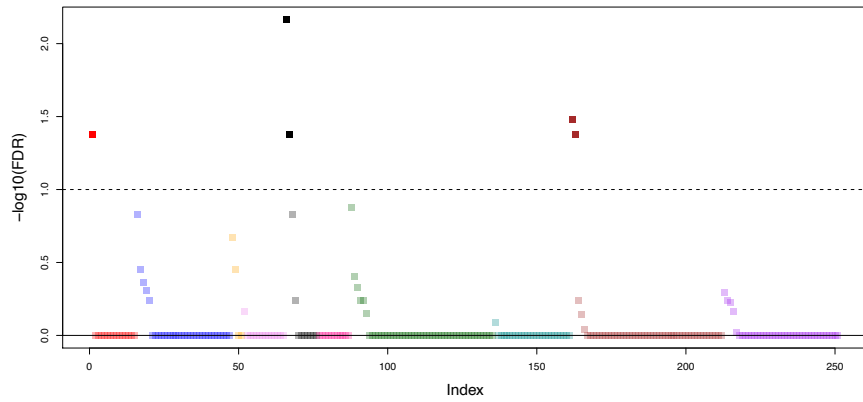



# Toilet type

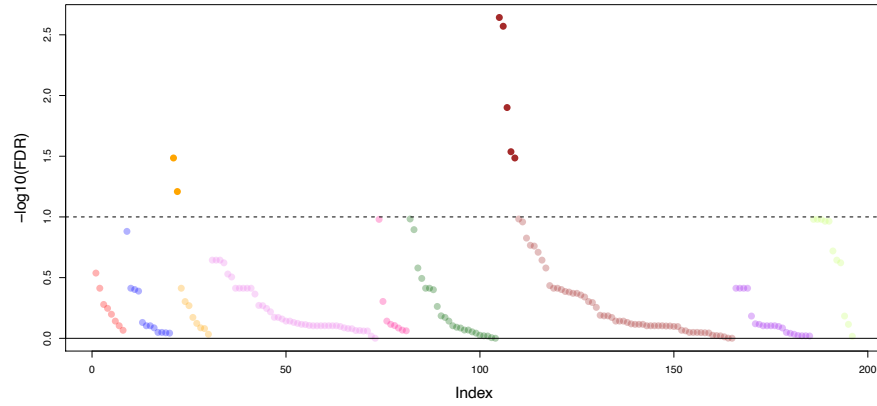

- Actinomycetales
- Bacteroidales
- Christensenellales
- Coriobacteriales
- Enterobacteriales
- Erysipelotrichales
- Lachnospirales
- Lactobacillales
- Oscillospirales
- other
- Saccharimonadales
- novel
- known

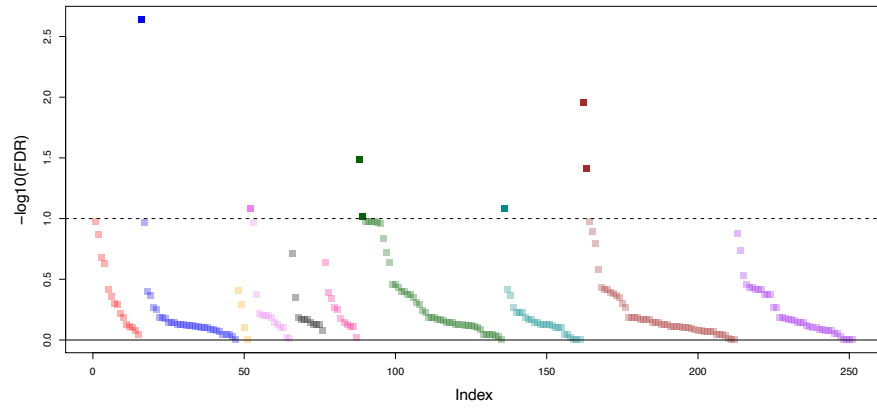

Supplement: msystems.00200-22-s0004.pdf [file msystems.00200-22-s0004.pdf]
