# Supplementary material for: Loss of Novel Diversity in Human Gut Microbiota Associated with Ongoing Urbanization in China
Source: PubMed Central journal article supplement (PMC9426419; doi:10.1128/msystems.00200-22), 2022-06-21

**P = 0.00024**

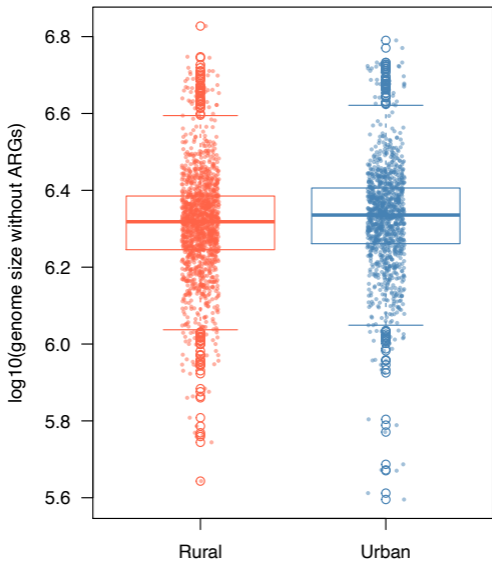

Supplement: msystems.00200-22-s0005.pdf [file msystems.00200-22-s0005.pdf]
